# Supplementary material for: Predictive Value of the Serum Cystatin C/Prealbumin Ratio in Combination With NT-proBNP Levels for Long-Term Prognosis in Chronic Heart Failure Patients: A Retrospective Cohort Study
Source: Frontiers journal article supplement (doi:10.3389/fcvm.2021.684919), 2021-07-14
Supplement: Data_Sheet_1.PDF [file Data_Sheet_1.PDF]

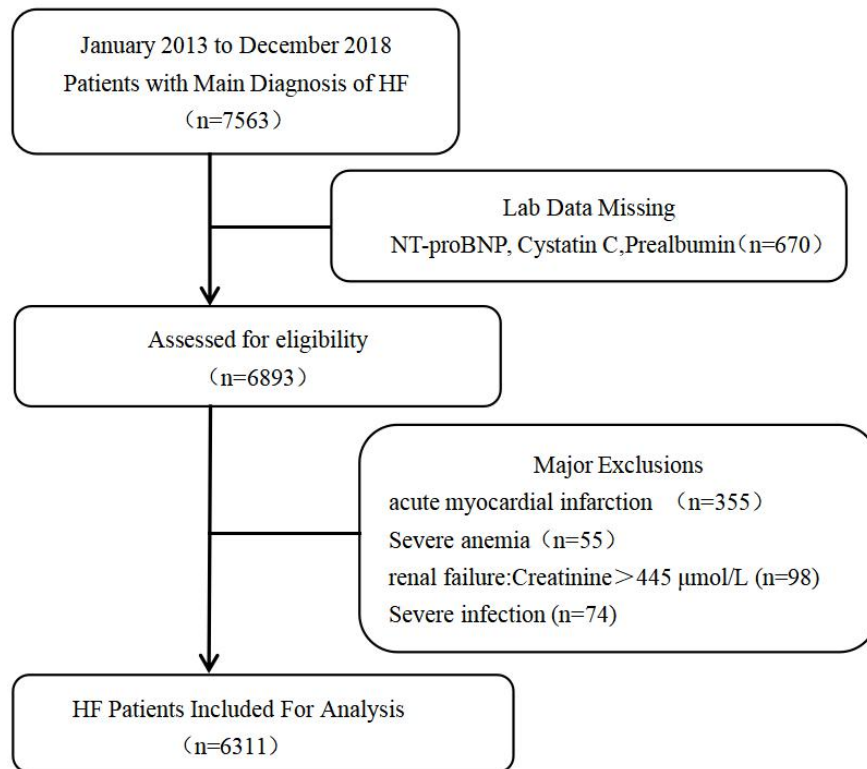

Supplementary Figure 1. Flow diagram of participant selection.
